# Supplementary material for: TMEM189 as a target gene of MiR-499a-5p regulates breast cancer progression through the ferroptosis pathway
Source: PubMed Central journal article supplement — J Clin Biochem Nutr. 2023 Sep 1;73(2):154–60. doi: 10.3164/jcbn.22-130 (PMC10493215; doi:10.3164/jcbn.22-130), 2023-09-01
Supplement: jcbn22-130_1.pdf [file jcbn22-130_1.pdf]

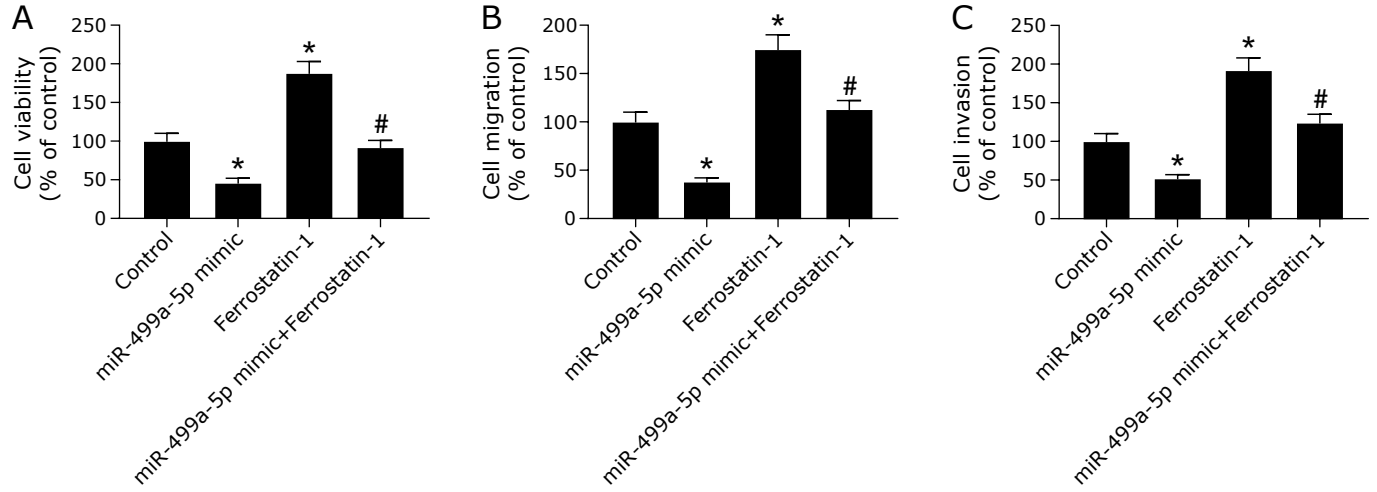

**Supplemental Fig. 1.** The effect of ferrostatin-1 on the viability, migration, and invasion of MDA-MB-231 cells. (A) Cell viability was measured by CCK-8. (B) The migration ability of cells in each group was detected by wound healing assay. (C) The invasive ability of cells in each group was determined by transwell assay. \* $p < 0.05$ , # $p < 0.05$ .
